# Supplementary material for: SIRT6 protects against endothelial dysfunction and atherosclerosis in mice
Source: PubMed Central journal article supplement (PMC4931854; doi:10.18632/aging.100975), 2016-05-30
Supplement: aging-08-1064-s001.pdf [file aging-08-1064-s001.pdf]

SUPPLEMENTAL DATA

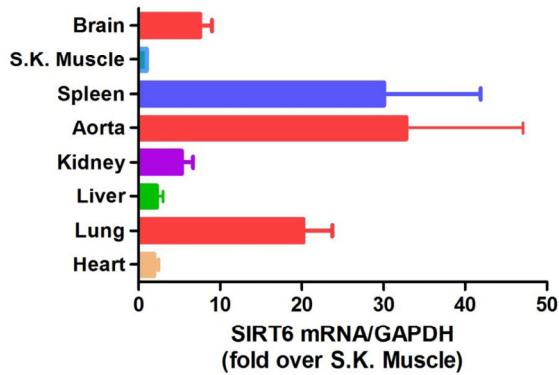

**Figure S1. Tissue distribution of SIRT6.** SIRT6 is expressed in multiple mouse tissues (C57BL/6J mice, 3 month old) as measured by qRT-PCR. In addition to the spleen (which harbors erythrocytes, monocytes, B- and T-lymphocytes), endothelial cell-enriched aortic, lung and brain tissues show the enrichment of SIRT6 gene expression. Relative SIRT6 mRNA to GAPDH level in skeletal (S.K.) muscle was set at 1.0,  $n = 3$ .

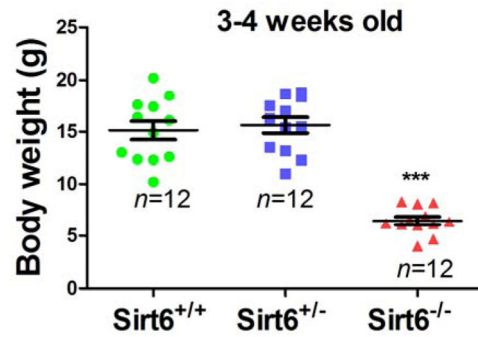

**Figure S2. Body weight of SIRT6 wild type and mutant mice at 3-4 weeks of age.** Data are presented as Mean±SEM, \*\*\* $P < 0.001$ .

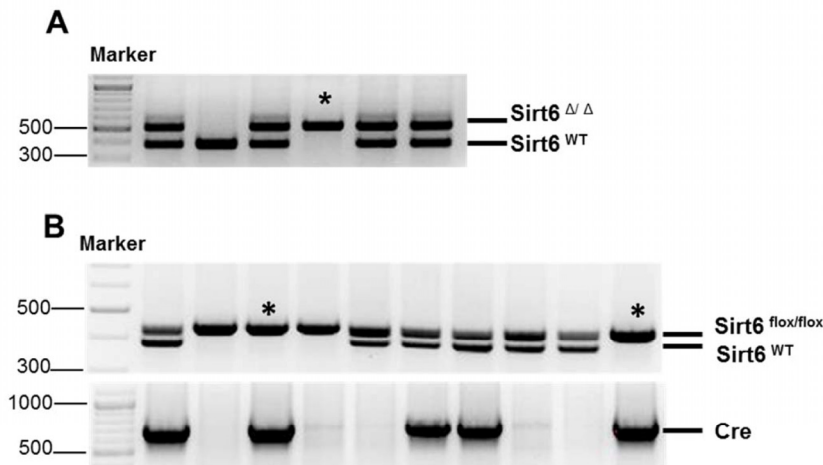

**Figure S3. Genotyping of total and endothelium-specific knockout mice.** SIRT6<sup>-/-</sup> mice (\*, panel A) were generated by SIRT6<sup>+/-</sup> cross-breeding. Endothelium-specific SIRT6 knockout mice (ecSIRT6<sup>-/-</sup>, labelled as \*, Tie2-Cre; SIRT6<sup>flox/flox</sup>, panel B) were generated by cross-breeding male Tie2-Cre; SIRT6<sup>flox/+</sup> mice with female SIRT6<sup>flox/flox</sup> mice. Representative image shows the results of genotypes by tail genomic DNA PCR method. SIRT6<sup>Δ</sup>, SIRT6<sup>flox</sup> and SIRT6<sup>WT</sup> band appears at 524 bp, 444 bp, and 390 bp, respectively.

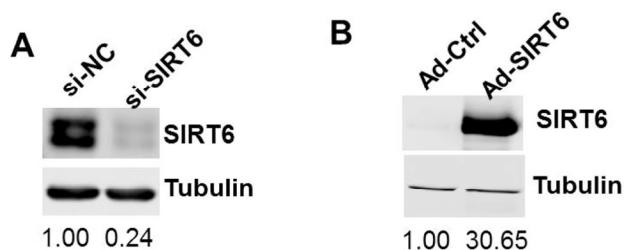

**Figure S4. Silencing efficiency of SIRT6 siRNA and over-expression efficiency of SIRT6 adenovirus.** Western blot analysis of protein expression of SIRT6 in HUVECs transfected with SIRT6 siRNA (20 nM, 48 h, A) or infected with SIRT6 adenovirus (M.O.I. 10, 24 h, B),  $n=4$  for panel A and  $n=3$  for panel B.

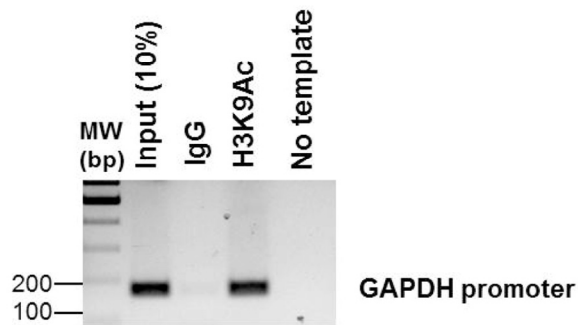

**Figure S5. Validation of H3K9 antibody for ChIP assay.** ChIP was performed using chromatin from HUVECs and incubated with either rabbit H3K9Ac or normal rabbit IgG as the immunoprecipitating antibody. Purified DNA was then analyzed by PCR using control primers specific for the GAPDH promoter (166 bp). PCR product was observed in the anti-H3K9Ac ChIP (lane 3) but not in the normal rabbit IgG ChIP (lane 2). GAPDH promoter specific DNA was also observed in the Input (lane 1) and not in the “No template” PCR control (lane 4). Representative blots from 3 independent experiments.

**Supplementary Table S1. Body weight, systolic blood pressure and heart rate of SIRT6 total knockout (SIRT6<sup>-/-</sup>) and endothelium-specific knockout (ecSIRT6<sup>-/-</sup>, Tie2-Cre; SIRT6<sup>flox/flox</sup>) mice.** Data are presented as Mean±SD, n=8-15. \*P<0.05; \*\*\*P<0.001.

| Genotypes                            | Body weight (g) | Systolic blood pressure (mmHg) | Heart rate (bpm) |
|--------------------------------------|-----------------|--------------------------------|------------------|
| SIRT6 <sup>+/+</sup>                 | 35.8±6.2        | 110.8±9.0                      | 647.5±53.4       |
| SIRT6 <sup>+/-</sup>                 | 35.7±4.9        | 118.3±11.9                     | 663.8±49.7       |
| SIRT6 <sup>-/-</sup>                 | 28.8±3.1***     | 98.5±9.7*                      | 525.3±48.8***    |
| SIRT6 <sup>flox/flox</sup>           | 34.0±5.1        | 116.0±13.8                     | 636.9±78.0       |
| Tie2-Cre; SIRT6 <sup>flox/flox</sup> | 36.6±5.2        | 104.8±8.7                      | 652.3±65.2       |

**Supplementary Table S2. Analysis of progeny from male Tie2-Cre; SIRT6<sup>flox/+</sup> mice and female SIRT6<sup>flox/flox</sup> intercross.**

| Genotypes  | SIRT6 <sup>flox/+</sup> | SIRT6 <sup>flox/flox</sup> | Tie2-Cre; SIRT6 <sup>flox/+</sup> | Tie2-Cre; SIRT6 <sup>flox/flox</sup> |
|------------|-------------------------|----------------------------|-----------------------------------|--------------------------------------|
| Number     | 39                      | 32                         | 35                                | 33                                   |
| Percentile | 28.1                    | 23.0                       | 25.2                              | 23.7                                 |

**Supplementary Table S3. Analysis of progeny from male Tie2-Cre; SIRT6<sup>flox/+</sup> mice and female SIRT6<sup>flox/flox</sup> intercross.**

| Lipid profile        | Sirt6 <sup>+/+</sup> ; ApoE <sup>-/-</sup> (n=7) | Sirt6 <sup>+/-</sup> ; ApoE <sup>-/-</sup> (n=8) | p Value |
|----------------------|--------------------------------------------------|--------------------------------------------------|---------|
| TG (mg/dl)           | 59.89 ± 5.868                                    | 59.36 ± 2.140                                    | 0.9295  |
| HDL-C (mg/dl)        | 44.56 ± 9.863                                    | 88.60 ± 7.077                                    | 0.0027  |
| LDL-C/VLDL-C (mg/dl) | 424.1 ± 38.62                                    | 352.6 ± 21.72                                    | 0.1188  |

8 weeks Sirt6<sup>+/+</sup>; ApoE<sup>-/-</sup> and Sirt6<sup>+/-</sup>; ApoE<sup>-/-</sup> mice were fed a HFD for 8 weeks, then fasted serum was collected for detecting lipid levels as described in Method section.

**Supplementary Table S4. Genes significantly down-regulated >40% after the infection with SIRT6 adenovirus for 24 h.** Please browse Full text version to see data of this table.

**Supplementary Table S5. Genes significantly upregulated by 1-fold after the infection with SIRT6 adenovirus for 24 h.** Please browse Full text version to see data of this table.

**Supplementary Table S6. List of antibodies.**

| Antibodies | Supplier, Cat. No.     | Dilution  | Application                 |
|------------|------------------------|-----------|-----------------------------|
| SIRT6      | Cell Signaling, #12486 | 1:1,000   | Western blot (mice tissues) |
|            | Abcam, #ab62739        | 1:1,000   | Western blot (mice tissues) |
|            |                        | 2 µg/ChIP | ChIP assay                  |
| SIRT6      | Sigma-Aldrich, #S4322  | 1:1,000   | Western blot                |
|            |                        | 2 µg/ChIP | ChIP assay                  |
| H3K9Ac     | Sigma-Aldrich, #H9286  | 2 µg/ChIP | ChIP assay                  |
| ICAM-1     | Santa Cruz, #sc-8439   | 1: 1,000  | Western blot                |
| VCAM-1     | Santa Cruz, #sc-1504   | 1: 1,000  | Western blot                |
| α-Tubulin  | Sigma, #T5168          | 1:10,000  | Western blot                |
| GAPDH      | Millipore, #AB2302     | 1: 5,000  | Western blot                |
| Rbt IgG    | Santa Cruz, #sc-2027   | 2 µg/ChIP | ChIP assay                  |

**Supplementary Table S7. List of primers  
Real-time PCR (qPCR)**

| Gene    | Sequence (5'-3')                                                    |
|---------|---------------------------------------------------------------------|
| mSirt6  | Forward: CGTCTGGTCATTGCAACCT<br>Reverse: GAGTCTGCACATCACCTCATC      |
| mGAPDH  | Forward: AACAGCAACTCCCACTCTTC<br>Reverse: CCTGTTGCTGTAGCCGTATT      |
| hTNFSF4 | Forward: ATCTCCCTGAAGGGCTACTT<br>Reverse:<br>GTTGACAGACCTGACCTTCTTC |
| hGAPDH  | Forward: GATTCCACCCATGGCAAATTC<br>Reverse: CTGGAAGATGGTGATGGGATT    |

m, mouse; h, human

**Supplementary Table S7. List of primers  
ChIP-q PCR**

| Promoter | Sequence (5'-3')                                                      |
|----------|-----------------------------------------------------------------------|
| GAPDH*   | Forward: AACAGCAACTCCCACTCTTC<br>Reverse: CCTGTTGCTGTAGCCGTATT        |
| TNFSF4   | Forward: GGAAGGAAAGGAGACAAGGATAC<br>Reverse: CCCTTTGAGGCAAATTCAATAAAC |

\*Primer sequence refers to EMD Millipore website (ChIP Validated H3K9Ac Antibody and Primer Set):

[http://www.emdmillipore.com/US/en/product/,MM\\_NF-17-609](http://www.emdmillipore.com/US/en/product/,MM_NF-17-609).
